# Supplementary material
Source: PubMed Central journal article supplement (PMC2993244)
Supplement: NIHMS242751-supplement-01.pdf [file NIHMS242751-supplement-01.pdf]

**Table S1, related to Figure 1**

**Disomic Strains During Continuous Growth Experiments**

| Strain   | Generations at day 9 | Generations at day 14 | Generation when doubling time decreased |
|----------|----------------------|-----------------------|-----------------------------------------|
| Dis I    | 59                   | 94                    | N/A                                     |
| Dis II   | 63                   | 97                    | N/A                                     |
| Dis IV   | 37                   | 64                    | 12                                      |
| Dis V    | 46                   | 78                    | 14                                      |
| Dis VIII | 49                   | 84                    | 24                                      |
| Dis IX   | 51                   | 82                    | 38                                      |
| Dis X    | 66                   | 102                   | N/A                                     |
| Dis XI   | 62                   | 105                   | 19                                      |
| Dis XII  | 48                   | 74                    | N/A                                     |
| Dis XIII | 51                   | 87                    | 36                                      |
| Dis XIV  | 60                   | 97                    | 24                                      |
| Dis XV   | 55                   | 92                    | 55                                      |
| Dis XVI  | 41                   | 75                    | 26                                      |

\*N/A = Not analyzed. No significant decrease in doubling time was detected during the continuous growth experiment.

**Table S2, related to Figure 1**  
**Summary of Karyotypes of Evolved Strains**

| STRAIN                 | STRAIN # <sup>2</sup> | KARYOTYPE                                                                |
|------------------------|-----------------------|--------------------------------------------------------------------------|
| Dis I-9.1 <sup>1</sup> | A25034                | Parental                                                                 |
| Dis I-9.2              | A25035                | Parental                                                                 |
| Dis I-14.1             | A25060                | Parental                                                                 |
| Dis I-14.2             | A25061                | Parental                                                                 |
| Dis II-9.1             | A25036                | Parental                                                                 |
| Dis II-9.2             | A25037                | Parental                                                                 |
| Dis II-14.1            | A25062                | Parental                                                                 |
| Dis II-14.2            | A25063                | Parental                                                                 |
| Dis IV-9.1             | A25038                | 2N - Chr VI                                                              |
| Dis IV-9.2             | A25039                | 2N - Chr VI                                                              |
| Dis IV-14.1            | A25064                | 2N - Chr VI                                                              |
| Dis IV-14.2            | A25065                | Disome II                                                                |
| Dis V-9.1              | A25040                | Parental                                                                 |
| Dis V-9.2              | A25041                | Parental                                                                 |
| Dis V-14.1             | A25066                | Parental                                                                 |
| Dis V-14.2             | A25067                | Parental                                                                 |
| Dis VIII-9.1           | A25042                | Parental                                                                 |
| Dis VIII-9.2           | A25043                | Parental                                                                 |
| Dis VIII-14.1          | A25068                | Parental                                                                 |
| Dis VIII-14.2          | A25069                | Parental                                                                 |
| Dis IX-9.1             | A25044                | Parental                                                                 |
| Dis IX-9.2             | A25045                | Parental                                                                 |
| Dis IX-14.1            | A25070                | Parental                                                                 |
| Dis IX-14.2            | A25071                | Parental                                                                 |
| Dis X-9.1              | A25046                | Parental                                                                 |
| Dis X-9.2              | A25047                | Parental                                                                 |
| Dis X-14.1             | A25072                | Parental                                                                 |
| Dis X-14.2             | A25073                | Parental                                                                 |
| Dis XI-9.1             | A25048                | Parental                                                                 |
| Dis XI-9.2             | A25049                | Parental                                                                 |
| Dis XI-14.1            | A25074                | Parental                                                                 |
| Dis XI-14.2            | A25075                | Parental                                                                 |
| Dis XII-9.1            | A25050                | Truncation (TEL12L-YLR035C), dup (Chr XIII)(TEL13L-YML046W)              |
| Dis XII-9.2            | A25051                | Parental                                                                 |
| Dis XII-14.1           | A25076                | Truncation (TEL12L-YLR035C), dup (Chr XIII)(TEL13L-YML046W)              |
| Dis XII-14.2           | A25077                | Truncation (TEL12L-YLR035C), dup (Chr XIII)(TEL13L-YML046W)              |
| Dis XIII-9.1           | A25052                | Parental                                                                 |
| Dis XIII-9.2           | A25053                | Parental                                                                 |
| Dis XIII-14.1          | A25078                | Parental                                                                 |
| Dis XIII-14.2          | A25079                | Parental                                                                 |
| Dis XIV-9.1            | A25054                | Parental                                                                 |
| Dis XIV-9.2            | A25055                | Parental                                                                 |
| Dis XIV-14.1           | A25080                | Truncation (YNL054W-YNR069C), dup (Chr XIII)(TEL13L-YML046W)             |
| Dis XIV-14.2           | A25081                | Parental                                                                 |
| Dis XV-9.1             | A25056                | Truncation (TEL15L-YOR192C), dup (Chr XIII)(TEL13L-YML046W)              |
| Dis XV-9.2             | A25057                | Truncation (TEL15L-YOR192C), dup (Chr XIV)(TEL14L-YNL286W), dup (Chr II) |
| Dis XV-14.1            | A25082                | Truncation (YOL103W-YOR142W)                                             |
| Dis XV-14.2            | A25083                | Truncation (TEL15L-YOR192C), dup (Chr XIV)(TEL14L-YNL286W)               |
| Dis XVI-9.1            | A25058                | Parental                                                                 |
| Dis XVI-9.2            | A25059                | Parental                                                                 |
| Dis XVI-14.1           | A25084                | Parental                                                                 |
| Dis XVI-14.2           | A25085                | Parental                                                                 |

<sup>1</sup>9.1 and 9.2 refer to isolates 1 and 2 from day 9, respectively. 14.1 and 14.2 refer to isolates 1 and 2 from day 14, respectively.

<sup>2</sup>See to Table S6 for genotypes.

**Table S4A, related to Table 1**  
**Synonymous Genetic Changes in the Evolved Disomic Strains**

| STRAIN                  | GENE               | SILENT MUTATION | METHOD <sup>1</sup> |
|-------------------------|--------------------|-----------------|---------------------|
| Dis V-14.1 <sup>2</sup> | FIR1, 217050 (het) | C to M          | S                   |
| Dis IX-14.1             | TOM40, 668865      | A to C          | T                   |
| Dis IX-14.1             | YNL311C, 50665     | G to A          | T                   |
| Dis XIV-14.2            | GLN3, 230700       | C to T          | T                   |

**Table S4B, related to Table 1**  
**Mutations in the Parental Disomic Strains**

| STRAIN                                  | GENE                 | MUTATION   | METHOD <sup>1</sup> | DESCRIPTION                                                        |
|-----------------------------------------|----------------------|------------|---------------------|--------------------------------------------------------------------|
| Dis V-14.1 <sup>2</sup>                 | YCR043C, 206284      | A to G     | T, S                | Silent<br>Deletion                                                 |
| Dis V-14.1                              | Chr (XIII), 465155   | G deletion | T                   |                                                                    |
| Dis V-14.1                              | SAK1 (het)           | A160E      | S                   |                                                                    |
| Dis V-14.1                              | VRG4                 | G270C      | S                   |                                                                    |
| Dis VIII-14.1                           | Chr XII, 493736      | G to C     | T                   | Intergenic<br>Silent<br>Silent<br>Silent                           |
| Dis VIII-14.1                           | CHO2, 804817         | A to G     | T                   |                                                                    |
| Dis VIII-14.1                           | DED81, 143311        | G to K     | T                   |                                                                    |
| Dis VIII-14.1                           | IST1/YNL266W, 144521 | T to C     | T                   |                                                                    |
| Dis IX-14.1                             | PRP8                 | T1544N     | T                   |                                                                    |
| Dis IX-14.1                             | SKN7                 | A203V      | T                   |                                                                    |
| Dis XI-9.1, Dis XI-9.2, Dis XI-14-1     | BRE4                 | A154P      | T, S                | Silent<br><br><br><br>Intergenic<br>Silent                         |
| Dis XI-9.1, Dis XI-9.2, Dis XI-14-1     | DBF4, 559577         | G to A     | T, S                |                                                                    |
| Dis XI-9.1, Dis XI-9.2, Dis XI-14-1     | MKT1                 | F773Y      | T, S                |                                                                    |
| Dis XI-9.1, Dis XI-9.2, Dis XI-14-1     | MYO3 (het)           | L836F      | S                   |                                                                    |
| Dis XI-9.1, Dis XI-9.2, Dis XI-14-1     | Chr XI, 431019 (het) | G to R     | S                   |                                                                    |
| Dis XI-9.1, Dis XI-9.2, Dis XI-14-1     | ERP1, 154396         | A to G     | S                   |                                                                    |
| Dis XI-9.1, Dis XI-9.2, Dis XI-14-1     | STT4                 | I1693L     | S                   |                                                                    |
| Dis XIII-9.1, Dis XIII-14.1             | ATG20                | K471T      | T, S                |                                                                    |
| Dis XIII-9.1, Dis XIII-14.1             | Chr VII, 20503       | G to A     | T, S                | Intergenic                                                         |
| Dis XIII-9.1, Dis XIII-14.1             | YGL036W              | D903N      | T, S                |                                                                    |
| Dis XIII-9.1, Dis XIII-14.1             | PHO84                | G25V       | T, S                |                                                                    |
| Dis XIII-9.1, Dis XIII-14.1             | Chr XV, 128508       | C to T     | T, S                | Intergenic                                                         |
| Dis XIII-9.1, Dis XIII-14.1             | TRS33                | K89E       | T, S                |                                                                    |
| Dis XIV-9.1, Dis XIV-9.2, Dis XIV-14.2  | YGL140C              | T537K      | T, S                | Silent                                                             |
| Dis XIV-9.1, Dis XIV-9.2, Dis XIV-14.2  | BIO5, 732966         | A to G     | T, S                |                                                                    |
| Dis XVI-9.1, Dis XVI-14.1, Dis XVI-14.2 | TOM1                 | P495R      | S                   | Silent<br>Silent<br>Silent<br>Silent<br>Silent<br>Silent<br>Silent |
| Dis XVI-9.1, Dis XVI-14.1, Dis XVI-14.2 | NMD2                 | T343S      | S                   |                                                                    |
| Dis XVI-9.1, Dis XVI-14.1, Dis XVI-14.2 | TRZ1                 | S373C      | S                   |                                                                    |
| Dis XVI-9.1, Dis XVI-14.1, Dis XVI-14.2 | YLR345W              | H372N      | S                   |                                                                    |
| Dis XVI-9.1, Dis XVI-14.1, Dis XVI-14.2 | VPS41, 606704        | C to T     | S                   |                                                                    |
| Dis XVI-9.1, Dis XVI-14.1, Dis XVI-14.2 | YFR020W, 193283      | T to C     | S                   |                                                                    |
| Dis XVI-9.1, Dis XVI-14.1, Dis XVI-14.2 | FAS2, 112272         | G to R     | S                   |                                                                    |

<sup>1</sup>T = Tiling microarray, S = Solexa sequencing.

<sup>2</sup> 9.1 and 9.2 refer to isolates 1 and 2 from day 9, respectively. 14.1 and 14.2 refer to isolates 1 and 2 from day 14, respectively.

**Table S6, related to Extended Experimental Procedures**

**Strains Utilized in this Study**

**Wild-type**

| Strain Number | Genotype                                                                    |
|---------------|-----------------------------------------------------------------------------|
| A2587         | <i>MATa, ade2-1, leu2-3, ura3, trp1-1, his3-11, 15, can1-100, GAL, psi+</i> |
| A2588         | <i>MAT , ade2-1, leu2-3, ura3, trp1-1, his3-11, 15, can1-100, GAL, psi+</i> |

| Strain Number | Relevant Genotype                                                                                            |
|---------------|--------------------------------------------------------------------------------------------------------------|
| A11311        | <i>MATa, ade1::HIS3, lys2::KanMX6</i>                                                                        |
| A21953        | <i>MAT , pgk1::pgk1-yEGFP-CaURA3</i>                                                                         |
| A21954        | <i>MATa, ade1::HIS3, lys2::KanMX6, pgk1::pgk1-yEGFP-CaURA3</i>                                               |
| A22023        | <i>MAT , ubp6::CaURA3</i>                                                                                    |
| A22024        | <i>MATa, ade1::HIS3, lys2::KanMX6, ubp6::CaURA3</i>                                                          |
| A22365        | <i>MAT , ubp6::ubp6-E256X-CaURA3</i>                                                                         |
| A22366        | <i>MATa, ade1::HIS3, lys2::KanMX6, ubp6::ubp6-E256X-CaURA3</i>                                               |
| A22363        | <i>MAT , intergenic region (181900-182000) between YFR016C and YFR017C::CaURA3</i>                           |
| A23504        | <i>MATa, ade1::HIS3, lys2::KanMX6, intergenic region (181900-182000) between YFR016C and YFR017C::CaURA3</i> |
| A25094        | <i>MAT , [YEPlac181+CUP1-pr-UBI4]</i>                                                                        |
| A25126        | <i>MATa, ade1::HIS3, lys2::KanMX6, pgk1::pgk1-yEGFP-CaURA3, [YEPlac181+CUP1-pr-UBI4]</i>                     |
| A25095        | <i>MATa, ade1::HIS3, lys2::KanMX6, ubp6::CaURA3, [YEPlac181+CUP1-pr-UBI4]</i>                                |
| A25130        | <i>MATa, ade1::HIS3, lys2::KanMX6, ubp6::ubp6-E256X-CaURA3 [YEPlac181+CUP1-pr-UBI4]</i>                      |
| A26337        | <i>MAT , ubp6::ubp6CA</i>                                                                                    |
| A26338        | <i>MATa, ade1::HIS3, lys2::KanMX6, ubp6::ubp6CA</i>                                                          |
| A26328        | <i>MAT , rpn6-ts</i>                                                                                         |
| A25112        | <i>MATa, ade1::HIS3, lys2::KanMX6, pgk1::pgk1-yEGFP-CaURA3, [YEPlac181]</i>                                  |

**Parental Aneuploid Strains**

| Strain Number | Disomic for Chromosome | Relevant Genotype                       |
|---------------|------------------------|-----------------------------------------|
| A12683        | I                      | <i>MATa, ade1::HIS3, ade1::KanMX6</i>   |
| A12685        | II                     | <i>MATa, lys2::HIS3, lys2::KanMX6</i>   |
| A12687        | IV                     | <i>MATa, trp1::HIS3, trp1::KanMX6</i>   |
| A12689        | X                      | <i>MATa, ura2::HIS3, ura2::KanMX6</i>   |
| A12693        | XII                    | <i>MATa, ade16::HIS3, ade16::KanMX6</i> |

|        |      |                                                                                                                                                             |
|--------|------|-------------------------------------------------------------------------------------------------------------------------------------------------------------|
| A12695 | XIII | <i>MATa, ura5::HIS3, ura5::KanMX6</i>                                                                                                                       |
| A12697 | XV   | <i>MATa, leu9::HIS3, leu9::KanMX6</i>                                                                                                                       |
| A12700 | XVI  | <i>MATa, met12::HIS3, met12::KanMX6</i>                                                                                                                     |
| A13628 | VIII | <i>MATa, intergenic region (119778-119573) between YHR006W and YHR007C::HIS3, intergenic region (119778-119573) between YHR006W and YHR007C::KanMX6</i>     |
| A13771 | XI   | <i>MATa, intergenic region (430900-431000) between YKL006C-A and YKL006W::HIS3, intergenic region (430900-431000) between YKL006C-A and YKL006W::KanMX6</i> |
| A13975 | IX   | <i>MATa, intergenic region (341900-34200) between YIL009W and YIL008W::HIS3, intergenic region (341900-34200) between YIL009W and YIL008W::KanMX6</i>       |
| A13979 | XIV  | <i>MATa, intergenic region (622880-622980) between YNL005C and YNL004W::HIS3, intergenic region (622880-622980) between YNL005C and YNL004W::KanMX6</i>     |
| A14479 | V    | <i>MATa, can1::HIS3, intergenic region (187520-187620) between YER015W and YER016W::KanMX6</i>                                                              |
| A21986 | X    | <i>MATa, intergenic region (322250-322350) between YJL061W and YJL060W::HIS3, intergenic region (322250-322350) between YJL061W and YJL060W::KanMX6</i>     |
| A21987 | XIII | <i>MATa, intergenic region (309200-309300) between YMR017W and YMR018W::HIS3, intergenic region (309200-309300) between YMR017W and YMR018W::KanMX6</i>     |

#### Evolved Isolates (see Table S2 for karyotypes)

| Strain Number | Disomic for Chromosome | Relevant Genotype                                                                                                                       |
|---------------|------------------------|-----------------------------------------------------------------------------------------------------------------------------------------|
| A25034        | I                      | <i>MATa, ade1::HIS3, ade1::KanMX6</i>                                                                                                   |
| A25035        | I                      | <i>MATa, ade1::HIS3, ade1::KanMX6</i>                                                                                                   |
| A25036        | II                     | <i>MATa, lys2::HIS3, lys2::KanMX6</i>                                                                                                   |
| A25037        | II                     | <i>MATa, lys2::HIS3, lys2::KanMX6</i>                                                                                                   |
| A25038        | IV                     | <i>MATa, trp1::HIS3, trp1::KanMX6</i>                                                                                                   |
| A25039        | IV                     | <i>MATa, trp1::HIS3, trp1::KanMX6</i>                                                                                                   |
| A25040        | V                      | <i>MATa, can1::HIS3, intergenic region (187520-187620) between YER015W and YER016W::KanMX6</i>                                          |
| A25041        | V                      | <i>MATa, can1::HIS3, intergenic region (187520-187620) between YER015W and YER016W::KanMX6</i>                                          |
| A25042        | VIII                   | <i>MATa, intergenic region (119778-119573) between YHR006W and YHR007C::HIS3, intergenic region (119778-119573) between YHR006W and</i> |

|        |      |                                                                                                                                                             |
|--------|------|-------------------------------------------------------------------------------------------------------------------------------------------------------------|
|        |      | <i>YHR007C::KanMX6</i>                                                                                                                                      |
| A25043 | VIII | <i>MATa, intergenic region (119778-119573) between YHR006W and YHR007C::HIS3, intergenic region (119778-119573) between YHR006W and YHR007C::KanMX6</i>     |
| A25044 | IX   | <i>MATa, intergenic region (341900-34200) between YIL009W and YIL008W::HIS3, intergenic region (341900-34200) between YIL009W and YIL008W::KanMX6</i>       |
| A25045 | IX   | <i>MATa, intergenic region (341900-34200) between YIL009W and YIL008W::HIS3, intergenic region (341900-34200) between YIL009W and YIL008W::KanMX6</i>       |
| A25046 | X    | <i>MATa, ura2::HIS3, ura2::KanMX6</i>                                                                                                                       |
| A25047 | X    | <i>MATa, ura2::HIS3, ura2::KanMX6</i>                                                                                                                       |
| A25048 | XI   | <i>MATa, intergenic region (430900-431000) between YKL006C-A and YKL006W::HIS3, intergenic region (430900-431000) between YKL006C-A and YKL006W::KanMX6</i> |
| A25049 | XI   | <i>MATa, intergenic region (430900-431000) between YKL006C-A and YKL006W::HIS3, intergenic region (430900-431000) between YKL006C-A and YKL006W::KanMX6</i> |
| A25050 | XII  | <i>MATa, ade16::HIS3, ade16::KanMX6</i>                                                                                                                     |
| A25051 | XII  | <i>MATa, ade16::HIS3, ade16::KanMX6</i>                                                                                                                     |
| A25052 | XIII | <i>MATa, ura5::HIS3, ura5::KanMX6</i>                                                                                                                       |
| A25053 | XIII | <i>MATa, ura5::HIS3, ura5::KanMX6</i>                                                                                                                       |
| A25054 | XIV  | <i>MATa, intergenic region (622880-622980) between YNL005C and YNL004W::HIS3, intergenic region (622880-622980) between YNL005C and YNL004W::KanMX6</i>     |
| A25055 | XIV  | <i>MATa, intergenic region (622880-622980) between YNL005C and YNL004W::HIS3, intergenic region (622880-622980) between YNL005C and YNL004W::KanMX6</i>     |
| A25056 | XV   | <i>MATa, leu9::HIS3, leu9::KanMX6</i>                                                                                                                       |
| A25057 | XV   | <i>MATa, leu9::HIS3, leu9::KanMX6</i>                                                                                                                       |
| A25058 | XVI  | <i>MATa, met12::HIS3, met12::KanMX6</i>                                                                                                                     |
| A25059 | XVI  | <i>MATa, met12::HIS3, met12::KanMX6</i>                                                                                                                     |
| A25060 | I    | <i>MATa, ade1::HIS3, ade1::KanMX6</i>                                                                                                                       |
| A25061 | I    | <i>MATa, ade1::HIS3, ade1::KanMX6</i>                                                                                                                       |
| A25062 | II   | <i>MATa, lys2::HIS3, lys2::KanMX6</i>                                                                                                                       |
| A25063 | II   | <i>MATa, lys2::HIS3, lys2::KanMX6</i>                                                                                                                       |
| A25064 | IV   | <i>MATa, trp1::HIS3, trp1::KanMX6</i>                                                                                                                       |
| A25065 | IV   | <i>MATa, trp1::HIS3, trp1::KanMX6</i>                                                                                                                       |
| A25066 | V    | <i>MATa, can1::HIS3, intergenic region (187520-187620)</i>                                                                                                  |

|        |      |                                                                                                                                                             |
|--------|------|-------------------------------------------------------------------------------------------------------------------------------------------------------------|
|        |      | <i>between YER015W and YER016W::KanMX6</i>                                                                                                                  |
| A25067 | V    | <i>MATa, can1::HIS3, intergenic region (187520-187620) between YER015W and YER016W::KanMX6</i>                                                              |
| A25068 | VIII | <i>MATa, intergenic region (119778-119573) between YHR006W and YHR007C::HIS3, intergenic region (119778-119573) between YHR006W and YHR007C::KanMX6</i>     |
| A25069 | VIII | <i>MATa, intergenic region (119778-119573) between YHR006W and YHR007C::HIS3, intergenic region (119778-119573) between YHR006W and YHR007C::KanMX6</i>     |
| A25070 | IX   | <i>MATa, intergenic region (341900-34200) between YIL009W and YIL008W::HIS3, intergenic region (341900-34200) between YIL009W and YIL008W::KanMX6</i>       |
| A25071 | IX   | <i>MATa, intergenic region (341900-34200) between YIL009W and YIL008W::HIS3, intergenic region (341900-34200) between YIL009W and YIL008W::KanMX6</i>       |
| A25072 | X    | <i>MATa, ura2::HIS3, ura2::KanMX6</i>                                                                                                                       |
| A25073 | X    | <i>MATa, ura2::HIS3, ura2::KanMX6</i>                                                                                                                       |
| A25074 | XI   | <i>MATa, intergenic region (430900-431000) between YKL006C-A and YKL006W::HIS3, intergenic region (430900-431000) between YKL006C-A and YKL006W::KanMX6</i> |
| A25075 | XI   | <i>MATa, intergenic region (430900-431000) between YKL006C-A and YKL006W::HIS3, intergenic region (430900-431000) between YKL006C-A and YKL006W::KanMX6</i> |
| A25076 | XII  | <i>MATa, ade16::HIS3, ade16::KanMX6</i>                                                                                                                     |
| A25077 | XII  | <i>MATa, ade16::HIS3, ade16::KanMX6</i>                                                                                                                     |
| A25078 | XIII | <i>MATa, ura5::HIS3, ura5::KanMX6</i>                                                                                                                       |
| A25079 | XIII | <i>MATa, ura5::HIS3, ura5::KanMX6</i>                                                                                                                       |
| A25080 | XIV  | <i>MATa, intergenic region (622880-622980) between YNL005C and YNL004W::HIS3, intergenic region (622880-622980) between YNL005C and YNL004W::KanMX6</i>     |
| A25081 | XIV  | <i>MATa, intergenic region (622880-622980) between YNL005C and YNL004W::HIS3, intergenic region (622880-622980) between YNL005C and YNL004W::KanMX6</i>     |
| A25082 | XV   | <i>MATa, leu9::HIS3, leu9::KanMX6</i>                                                                                                                       |
| A25083 | XV   | <i>MATa, leu9::HIS3, leu9::KanMX6</i>                                                                                                                       |
| A25084 | XVI  | <i>MATa, met12::HIS3, met12::KanMX6</i>                                                                                                                     |
| A25085 | XVI  | <i>MATa, met12::HIS3, met12::KanMX6</i>                                                                                                                     |

**GFP-Strains**

| <b>Strain Number</b> | <b>Disomic for Chromosome</b> | <b>Relevant Genotype</b>                                                                                                                                                             |
|----------------------|-------------------------------|--------------------------------------------------------------------------------------------------------------------------------------------------------------------------------------|
| A21955               | I                             | <i>MATa, ade1::HIS3, ade1::KanMX6, pgk1::pgk1-yEGFP-CaURA3</i>                                                                                                                       |
| A21956               | II                            | <i>MATa, lys2::HIS3, lys2::KanMX6, pgk1::pgk1-yEGFP-CaURA3</i>                                                                                                                       |
| A21957               | IV                            | <i>MATa, trp1::HIS3, trp1::KanMX6, pgk1::pgk1-yEGFP-CaURA3</i>                                                                                                                       |
| A21958               | V                             | <i>MATa, can1::HIS3, intergenic region (187520-187620) between YER015W and YER016W::KanMX6, pgk1::pgk1-yEGFP-CaURA3</i>                                                              |
| A21972               | V                             | <i>MAT , can1::HIS3, intergenic region (187520-187620) between YER015W and YER016W::KanMX6, pgk1::pgk1-yEGFP-CaURA3</i>                                                              |
| A21959               | VIII                          | <i>MATa, intergenic region (119778-119573) between YHR006W and YHR007C::HIS3, intergenic region (119778-119573) between YHR006W and YHR007C::KanMX6, pgk1::pgk1-yEGFP-CaURA3</i>     |
| A21960               | IX                            | <i>MATa, intergenic region (341900-34200) between YIL009W and YIL008W::HIS3, intergenic region (341900-34200) between YIL009W and YIL008W::KanMX6, pgk1::pgk1-yEGFP-CaURA3</i>       |
| A21962               | XI                            | <i>MATa, intergenic region (430900-431000) between YKL006C-A and YKL006W::HIS3, intergenic region (430900-431000) between YKL006C-A and YKL006W::KanMX6, pgk1::pgk1-yEGFP-CaURA3</i> |
| A21963               | XII                           | <i>MATa, ade16::HIS3, ade16::KanMX6, pgk1::pgk1-yEGFP-CaURA3</i>                                                                                                                     |
| A21964               | XIII                          | <i>MATa, intergenic region (309200-309300) between YMR017W and YMR018W::HIS3, intergenic region (309200-309300) between YMR017W and YMR018W::KanMX6, pgk1::pgk1-yEGFP-CaURA3</i>     |
| A21965               | XIV                           | <i>MATa, intergenic region (622880-622980) between YNL005C and YNL004W::HIS3, intergenic region (622880-622980) between YNL005C and YNL004W::KanMX6, pgk1::pgk1-yEGFP-CaURA3</i>     |
| A21966               | XV                            | <i>MATa, leu9::HIS3, leu9::KanMX6, pgk1::pgk1-yEGFP-CaURA3</i>                                                                                                                       |
| A21967               | XVI                           | <i>MATa, met12::HIS3, met12::KanMX6, pgk1::pgk1-yEGFP-CaURA3</i>                                                                                                                     |

**URA3 Marked Strains**

| <b>Strain Number</b> | <b>Disomic for Chromosome</b> | <b>Relevant Genotype</b> |
|----------------------|-------------------------------|--------------------------|
|----------------------|-------------------------------|--------------------------|



|        |      |                                                                                                                                                                                                                                     |
|--------|------|-------------------------------------------------------------------------------------------------------------------------------------------------------------------------------------------------------------------------------------|
| A23505 | I    | <i>MATa, ade1::HIS3, ade1::KanMX6, intergenic region (181900-182000) between YFR016C and YFR017C:: CaURA3</i>                                                                                                                       |
| A23506 | II   | <i>MATa, lys2::HIS3, lys2::KanMX6, intergenic region (181900-182000) between YFR016C and YFR017C:: CaURA3</i>                                                                                                                       |
| A23508 | V    | <i>MAT , can1::HIS3, intergenic region (187520-187620) between YER015W and YER016W::KanMX6, intergenic region (181900-182000) between YFR016C and YFR017C:: CaURA3</i>                                                              |
| A23509 | VIII | <i>MATa, intergenic region (119778-119573) between YHR006W and YHR007C::HIS3, intergenic region (119778-119573) between YHR006W and YHR007C::KanMX6, intergenic region (181900-182000) between YFR016C and YFR017C:: CaURA3</i>     |
| A23510 | IX   | <i>MATa, intergenic region (341900-34200) between YIL009W and YIL008W::HIS3, intergenic region (341900-34200) between YIL009W and YIL008W::KanMX6, intergenic region (181900-182000) between YFR016C and YFR017C:: CaURA3</i>       |
| A23512 | XI   | <i>MATa, intergenic region (430900-431000) between YKL006C-A and YKL006W::HIS3, intergenic region (430900-431000) between YKL006C-A and YKL006W::KanMX6, intergenic region (181900-182000) between YFR016C and YFR017C:: CaURA3</i> |
| A23514 | XIII | <i>MATa, intergenic region (309200-309300) between YMR017W and YMR018W::HIS3, intergenic region (309200-309300) between YMR017W and YMR018W::KanMX6, intergenic region (181900-182000) between YFR016C and YFR017C:: CaURA3</i>     |
| A23515 | XIV  | <i>MATa, intergenic region (622880-622980) between YNL005C and YNL004W::HIS3, intergenic region (622880-622980) between YNL005C and YNL004W::KanMX6, intergenic region (181900-182000) between YFR016C and YFR017C:: CaURA3</i>     |
| A23516 | XV   | <i>MATa, leu9::HIS3, leu9::KanMX6, intergenic region (181900-182000) between YFR016C and YFR017C::CaURA3</i>                                                                                                                        |
| A23517 | XVI  | <i>MATa, met12::HIS3, met12::KanMX6, intergenic region (181900-182000) between YFR016C and YFR017C:: CaURA3</i>                                                                                                                     |

***ubp6-E256X* Strains**

| <b>Strain Number</b> | <b>Disomic for Chromosome</b> | <b>Relevant Genotype</b>                           |
|----------------------|-------------------------------|----------------------------------------------------|
| A22367               | I                             | <i>MATa, ade1::HIS3, ade1::KanMX6, ubp6::ubp6-</i> |

|        |      |                                                                                                                                                                                      |
|--------|------|--------------------------------------------------------------------------------------------------------------------------------------------------------------------------------------|
|        |      | <i>E256X-CaURA3</i>                                                                                                                                                                  |
| A22368 | II   | <i>MATa, lys2::HIS3, lys2::KanMX6, ubp6::ubp6-E256X-CaURA3</i>                                                                                                                       |
| A22369 | IV   | <i>MATa, trp1::HIS3, trp1::KanMX6, ubp6::ubp6-E256X-CaURA3</i>                                                                                                                       |
| A22370 | V    | <i>MAT , can1::HIS3, intergenic region (187520-187620) between YER015W and YER016W::KanMX6, ubp6::ubp6-E256X-CaURA3</i>                                                              |
| A22371 | VIII | <i>MATa, intergenic region (119778-119573) between YHR006W and YHR007C::HIS3, intergenic region (119778-119573) between YHR006W and YHR007C::KanMX6, ubp6::ubp6-E256X-CaURA3</i>     |
| A22387 | IX   | <i>MATa, intergenic region (341900-34200) between YIL009W and YIL008W::HIS3, intergenic region (341900-34200) between YIL009W and YIL008W::KanMX6, ubp6::ubp6-E256X-CaURA3</i>       |
| A22390 | XI   | <i>MATa, intergenic region (430900-431000) between YKL006C-A and YKL006W::HIS3, intergenic region (430900-431000) between YKL006C-A and YKL006W::KanMX6, ubp6::ubp6-E256X-CaURA3</i> |
| A22391 | XII  | <i>MATa, ade16::HIS3, ade16::KanMX6, ubp6::ubp6-E256X-CaURA3</i>                                                                                                                     |
| A22392 | XIII | <i>MATa, intergenic region (309200-309300) between YMR017W and YMR018W::HIS3, intergenic region (309200-309300) between YMR017W and YMR018W::KanMX6, ubp6::ubp6-E256X-CaURA3</i>     |
| A22393 | XIV  | <i>MATa, intergenic region (622880-622980) between YNL005C and YNL004W::HIS3, intergenic region (622880-622980) between YNL005C and YNL004W::KanMX6, ubp6::ubp6-E256X-CaURA3</i>     |
| A22394 | XV   | <i>MATa, leu9::HIS3, leu9::KanMX6, ubp6::ubp6-E256X-CaURA3</i>                                                                                                                       |
| A22395 | XVI  | <i>MATa, met12::HIS3, met12::KanMX6, ubp6::ubp6-E256X-CaURA3</i>                                                                                                                     |

### ***ubp6*Δ Strains**

| <b>Strain Number</b> | <b>Disomic for Chromosome</b> | <b>Relevant Genotype</b>                                                                                     |
|----------------------|-------------------------------|--------------------------------------------------------------------------------------------------------------|
| A22025               | I                             | <i>MATa, ade1::HIS3, ade1::KanMX6, ubp6::CaURA3</i>                                                          |
| A22026               | II                            | <i>MATa, lys2::HIS3, lys2::KanMX6, ubp6::CaURA3</i>                                                          |
| A22027               | IV                            | <i>MATa, trp1::HIS3, trp1::KanMX6 ubp6::CaURA3</i>                                                           |
| A22028               | V                             | <i>MATa, can1::HIS3, intergenic region (187520-187620) between YER015W and YER016W::KanMX6, ubp6::CaURA3</i> |
| A22029               | VIII                          | <i>MATa, intergenic region (119778-119573) between YHR006W and YHR007C::HIS3, intergenic region</i>          |

|        |      |                                                                                                                                                                    |
|--------|------|--------------------------------------------------------------------------------------------------------------------------------------------------------------------|
|        |      | (119778-119573) between YHR006W and YHR007C::KanMX6, ubp6::CaURA3                                                                                                  |
| A22030 | IX   | MATa, intergenic region (341900-34200) between YIL009W and YIL008W::HIS3, intergenic region (341900-34200) between YIL009W and YIL008W::KanMX6, ubp6::CaURA3       |
| A22032 | XI   | MATa, intergenic region (430900-431000) between YKL006C-A and YKL006W::HIS3, intergenic region (430900-431000) between YKL006C-A and YKL006W::KanMX6, ubp6::CaURA3 |
| A22033 | XII  | MATa, ade16::HIS3, ade16::KanMX6, ubp6::CaURA3                                                                                                                     |
| A22034 | XIII | MATa, intergenic region (309200-309300) between YMR017W and YMR018W::HIS3, intergenic region (309200-309300) between YMR017W and YMR018W::KanMX6, ubp6::CaURA3     |
| A22035 | XIV  | MATa, intergenic region (622880-622980) between YNL005C and YNL004W::HIS3, intergenic region (622880-622980) between YNL005C and YNL004W::KanMX6, ubp6::CaURA3     |
| A22036 | XV   | MATa, leu9::HIS3, leu9::KanMX6, ubp6::CaURA3                                                                                                                       |
| A22037 | XVI  | MATa, met12::HIS3, met12::KanMX6, ubp6::CaURA3                                                                                                                     |

#### **Strains Carrying CUP1-pr-UBI4**

| <b>Strain Number</b> | <b>Disomic for Chromosome</b> | <b>Relevant Genotype</b>                                                                                                                                                                                |
|----------------------|-------------------------------|---------------------------------------------------------------------------------------------------------------------------------------------------------------------------------------------------------|
| A25127               | V                             | MATa, can1::HIS3, intergenic region (187520-187620) between YER015W and YER016W::KanMX6, pgk1::pgk1-yEGFP-CaURA3, [YEPlac181+CUP1-pr-UBI4]                                                              |
| A25128               | VIII                          | MATa, intergenic region (119778-119573) between YHR006W and YHR007C::HIS3, intergenic region (119778-119573) between YHR006W and YHR007C::KanMX6, pgk1::pgk1-yEGFP-CaURA3, [YEPlac181+CUP1-pr-UBI4]     |
| A25129               | XI                            | MATa, intergenic region (430900-431000) between YKL006C-A and YKL006W::HIS3, intergenic region (430900-431000) between YKL006C-A and YKL006W::KanMX6, pgk1::pgk1-yEGFP-CaURA3, [YEPlac181+CUP1-pr-UBI4] |
| A25098               | V                             | MATa, can1::HIS3, intergenic region (187520-187620) between YER015W and YER016W::KanMX6, ubp6::CaURA3, [YEPlac181+CUP1-pr-UBI4]                                                                         |
| A25101               | XI                            | MATa, intergenic region (430900-431000) between YKL006C-A and YKL006W::HIS3, intergenic region (430900-431000) between YKL006C-A and YKL006W::KanMX6, ubp6::CaURA3,                                     |

|        |      |                                                                                                                                                                                                         |
|--------|------|---------------------------------------------------------------------------------------------------------------------------------------------------------------------------------------------------------|
|        |      | [YEPlac181+CUP1-pr-UBI4]                                                                                                                                                                                |
| A25131 | VIII | MATa, intergenic region (119778-119573) between YHR006W and YHR007C::HIS3, intergenic region (119778-119573) between YHR006W and YHR007C::KanMX6, ubp6::ubp6-E256X-CaURA3, [YEPlac181+CUP1-pr-UBI4]     |
| A25136 | XI   | MATa, intergenic region (430900-431000) between YKL006C-A and YKL006W::HIS3, intergenic region (430900-431000) between YKL006C-A and YKL006W::KanMX6, ubp6::ubp6-E256X-CaURA3, [YEPlac181+CUP1-pr-UBI4] |

#### Strains Carrying YEPlac181

| Strain Number | Disomic for Chromosome | Relevant Genotype                                                                                                                                                                          |
|---------------|------------------------|--------------------------------------------------------------------------------------------------------------------------------------------------------------------------------------------|
| A25114        | V                      | MATa, can1::HIS3, intergenic region (187520-187620) between YER015W and YER016W::KanMX6, pgk1::pgk1-yEGFP-CaURA3, [YEPlac181]                                                              |
| A25115        | VIII                   | MATa, intergenic region (119778-119573) between YHR006W and YHR007C::HIS3, intergenic region (119778-119573) between YHR006W and YHR007C::KanMX6, pgk1::pgk1-yEGFP-CaURA3, [YEPlac181]     |
| A25117        | XI                     | MATa, intergenic region (430900-431000) between YKL006C-A and YKL006W::HIS3, intergenic region (430900-431000) between YKL006C-A and YKL006W::KanMX6, pgk1::pgk1-yEGFP-CaURA3, [YEPlac181] |

#### ubp6CA Strains

| Strain Number | Disomic for Chromosome | Relevant Genotype                                                                                                                                                  |
|---------------|------------------------|--------------------------------------------------------------------------------------------------------------------------------------------------------------------|
| A26340        | VIII                   | MATa, intergenic region (119778-119573) between YHR006W and YHR007C::HIS3, intergenic region (119778-119573) between YHR006W and YHR007C::KanMX6, ubp6::ubp6CA     |
| A26341        | IX                     | MATa, intergenic region (341900-34200) between YIL009W and YIL008W::HIS3, intergenic region (341900-34200) between YIL009W and YIL008W::KanMX6, ubp6::ubp6CA       |
| A26342        | XI                     | MATa, intergenic region (430900-431000) between YKL006C-A and YKL006W::HIS3, intergenic region (430900-431000) between YKL006C-A and YKL006W::KanMX6, ubp6::ubp6CA |
| A26344        | XV                     | MATa, leu9::HIS3, leu9::KanMX6, ubp6::ubp6CA                                                                                                                       |

**rpn6-ts Strains**

| <b>Strain Number</b> | <b>Disomic for Chromosome</b> | <b>Relevant Genotype</b>                                                                                                                                             |
|----------------------|-------------------------------|----------------------------------------------------------------------------------------------------------------------------------------------------------------------|
| A26329               | I                             | <i>MATa, ade1::HIS3, ade1::KanMX6, rpn6-ts</i>                                                                                                                       |
| A26330               | II                            | <i>MATa, lys2::HIS3, lys2::KanMX6, rpn6-ts</i>                                                                                                                       |
| A26331               | V                             | <i>MATa, can1::HIS3, intergenic region (187520-187620) between YER015W and YER016W::KanMX6, rpn6-ts</i>                                                              |
| A26332               | VIII                          | <i>MATa, intergenic region (119778-119573) between YHR006W and YHR007C::HIS3, intergenic region (119778-119573) between YHR006W and YHR007C::KanMX6, rpn6-ts</i>     |
| A26333               | IX                            | <i>MATa, intergenic region (341900-34200) between YIL009W and YIL008W::HIS3, intergenic region (341900-34200) between YIL009W and YIL008W::KanMX6, rpn6-ts</i>       |
| A26334               | X                             | <i>MATa, intergenic region (322250-322350) between YJL061W and YJL060W::HIS3, intergenic region (322250-322350) between YJL061W and YJL060W::KanMX6, rpn6-ts</i>     |
| A26335               | XI                            | <i>MATa, intergenic region (430900-431000) between YKL006C-A and YKL006W::HIS3, intergenic region (430900-431000) between YKL006C-A and YKL006W::KanMX6, rpn6-ts</i> |
| A26336               | XVI                           | <i>MATa, met12::HIS3, met12::KanMX6, rpn6-ts</i>                                                                                                                     |

**lys2 $\Delta$  Strains Utilized for Mass Spectroscopy**

| <b>Strain Number</b> | <b>Disomic for Chromosome</b> | <b>Relevant Genotype</b>                                                                                                                                                          |
|----------------------|-------------------------------|-----------------------------------------------------------------------------------------------------------------------------------------------------------------------------------|
| A23489               | V                             | <i>MATa, lys2::URA3, can1::HIS3, intergenic region (187520-187620) between YER015W and YER016W::KanMX6</i>                                                                        |
| A23495               | XIII                          | <i>MATa, lys2::URA3, intergenic region (309200-309300) between YMR017W and YMR018W::HIS3, intergenic region (309200-309300) between YMR017W and YMR018W::KanMX6</i>               |
| A23499               | V                             | <i>MATa, lys2::URA3, can1::HIS3, intergenic region (187520-187620) between YER015W and YER016W::KanMX6, ubp6::CaURA3</i>                                                          |
| A23503               | XIII                          | <i>MATa, lys2::URA3, intergenic region (309200-309300) between YMR017W and YMR018W::HIS3, intergenic region (309200-309300) between YMR017W and YMR018W::KanMX6, ubp6::CaURA3</i> |
